# Supplementary material
Source: publisher figshare collection journal article supplement (https://gsapubs.figshare.com/ndownloader/files/27269396)
Supplement: Supplementary file 1 [file 27269396]

## Sheet: Sheet1
Table DR1. Selected representative analyses of garnet, micas and feldspar from point analysis.
Min.	Grt	Grt	Grt	Grt	Grt	Grt		Bt	Bt	Bt	Bt		Ms	Ms	Ms	Ms		Pl	Pl	Pl	Or
Zone	(OR)	(OR)	(IR)	(C)	–	–		(C)	(IR)	(Tr)	–		(R)	(C)	(Tr)	–		(Tr)	–	–	–
Spec.	H65	H65	H65	H65	H37	H37		H65	H65	H65	H37		H65	H65	H65	H37		H65	H65	H37	H37
Anal.	206/2	206/15	206/34	206/50	46/1	88/1		210/1	230/1	193/1	18 / 1 .		215/1	209/1	94/1	67/1		98/1	182/16	69 /1	16/1
SiO2	37.2654	37.3597	36.8656	36.8504	37.0408	37.336		34.4946	36.3954	36.4637	35.7687		47.4494	47.1003	46.6423	47.2151		63.635	64.4958	65.2497	65.6943
TiO2	0.0721	0.041	0.0581	0.0592	0.0067	0.0166		1.9696	1.9558	2.1679	2.7489		1.015	0.163	0.6763	0.6906		0	0	0.0023	-0.0089
Al2O3	20.9732	20.7285	20.8326	20.6968	20.896	20.804		16.897	17.2147	16.5659	15.8036		29.5307	31.5372	29.7119	28.0099		22.9117	21.4987	21.7607	18.3729
FeO	31.8718	31.9496	30.3423	25.6862	25.3513	25.7077		30.9978	24.7279	24.8536	27.0833		5.4199	5.0974	4.8493	5.7631		0	0	0.0339	0
MnO	1.1312	1.61	3.6783	7.7953	9.1875	8.8157		0.6961	0.2207	0.1715	0.3084		0.0682	0.1078	0.0679	0.0585		0	0	0.0034	0
MgO	0.6071	0.4543	0.3152	0.2579	0.3662	0.3484		1.5234	5.1788	5.0852	3.8416		1.0297	0.5139	1.5291	1.4524		0	0	-0.0018	-0.0046
CaO	8.8277	8.5886	8.3562	8.4497	7.1673	7.4621		0.0211	-0.0017	0.0156	0.0197		0	0	0	0		3.9591	3.0578	2.8389	0.0117
Na2O	0.0026	0.0026	0.0026	0.0026	0.0026	0.0026		0.0522	0.0754	0.079	0.0751		0.1868	0.1572	0.2875	0.2636		9.6617	10.1933	10.4343	1.0632
K2O	0.0026	0.0026	0.0026	0.0026	0.0026	0.001		8.719	9.2195	9.0602	9.4096		10.439	10.5165	10.6818	10.5922		0.1672	0.1606	0.1631	15.4074
Σ	100.768	100.76	100.456	99.8374	100.112	100.569		95.3708	94.9865	94.4626	95.0589		95.2222	95.1933	94.4461	94.0454		100.335	99.4062	100.485	100.536
Ox.	12	12	12	12	12	12		11	11	11	11		11	11	11	11		8	8	8	8
Si	2.987	3.0005	2.97767	2.98914	2.99663	3.00628		2.78508	2.84536	2.86796	2.84407		3.22815	3.19464	3.2008	3.26612		2.80406	2.86237	2.86399	3.0078
Ti	0.00434595	0.00247625	0.00352901	0.00361116	0.000407614	0.00100515		0.119587	0.114984	0.128225	0.164368		0.0519289	0.00831392	0.034901	0.0359252		-0.000202135	0	7.59175e-05	-0.000306431
Al	1.9813	1.96207	1.98315	1.97862	1.99238	1.97426		1.60787	1.58615	1.53562	1.48098		2.36784	2.52102	2.40306	2.28359		1.18988	1.12451	1.1257	0.991413
Fetot	2.13645	2.14591	2.04956	1.74245	1.71518	1.7311		2.09302	1.61672	1.63478	1.80092		0.308368	0.289136	0.2783	0.333398		0.00241373	0	0.00124437	0.00114102
Mn	0.0767988	0.109522	0.251645	0.535578	0.629559	0.601235		0.047604	0.0146143	0.0114252	0.0207701		0.00393	0.00619302	0.00394669	0.00342762		0.00138095	0	0.000126403	-0.000632113
Mg	0.0725308	0.0543834	0.0379468	0.0311809	0.0441575	0.0418132		0.18333	0.603466	0.596148	0.455284		0.104416	0.0519529	0.156404	0.149751		-0.000669922	0	-0.00011776	-0.000313915
Ca	0.758114	0.739045	0.723139	0.73435	0.62125	0.643755		0.00182527	-0.000142396	0.0013146	0.00167827		0	0	-0.00129404	-0.00107467		0.186915	0.145399	0.133506	0.000573938
Na	0.00268858	0.00356594	0.00108057	0.00487544	0	0		0.00817155	0.011429	0.0120472	0.0115778		0.0246404	0.0206727	0.0382528	0.0353545		0.825453	0.877116	0.887983	0.0943809
K	0.000265844	0.000583969	0.000103034	0.00112786	0.00123839	0.000102713		0.898002	0.919437	0.909023	0.954406		0.905953	0.909899	0.935076	0.934678		0.00939835	0.0090921	0.00913212	0.899861
Prp	0.0238283	0.0178373	0.0123916	0.0102449	0.0146696	0.0138551		–	–	–	–		–	–	–	–		–	–	–	–
Alm	0.70188	0.70384	0.669289	0.572504	0.569799	0.57361		–	–	–	–		–	–	–	–		–	–	–	–
Grs	0.249061	0.2424	0.236143	0.24128	0.206385	0.213312		–	–	–	–		–	–	–	–		–	–	–	–
Sps	0.0252305	0.0359223	0.0821755	0.175971	0.209146	0.199223		–	–	–	–		–	–	–	–		–	–	–	–
Mg#	0.0328346	0.0247164	0.0181781	0.0175803	0.025099	0.0235845		0.0805368	0.271809	0.26722	0.201792		–	–	–	–		–	–	–	–
An	–	–	–	–	–	–		–	–	–	–		–	–	–	–		0.182934	0.140944	0.129539	0.000576929
Ab	–	–	–	–	–	–		–	–	–	–		–	–	–	–		0.807868	0.850242	0.8616	0.0948728
Or	–	–	–	–	–	–		–	–	–	–		–	–	–	–		0.00919814	0.00881353	0.0088608	0.90455
Abbrevations after Whitney and Evans (2010).
(C), (IR), (OR) refer to inclusions in garnet core, inner rim and outer rim, respectively. (Tr) refers to an inclusion in tourmaline.

## Sheet: G48803
Soret, M., et al., 2021, How Himalayan collision stems from subduction: Geology, v. 49, https://doi.org/10.1130/G48803.1
